# Supplementary figures and images for: Non-allelic gene conversion enables rapid evolutionary change at multiple regulatory sites encoded by transposable elements
Source: eLife journal article supplement (doi:10.7554/elife.05899), 2015-02-17

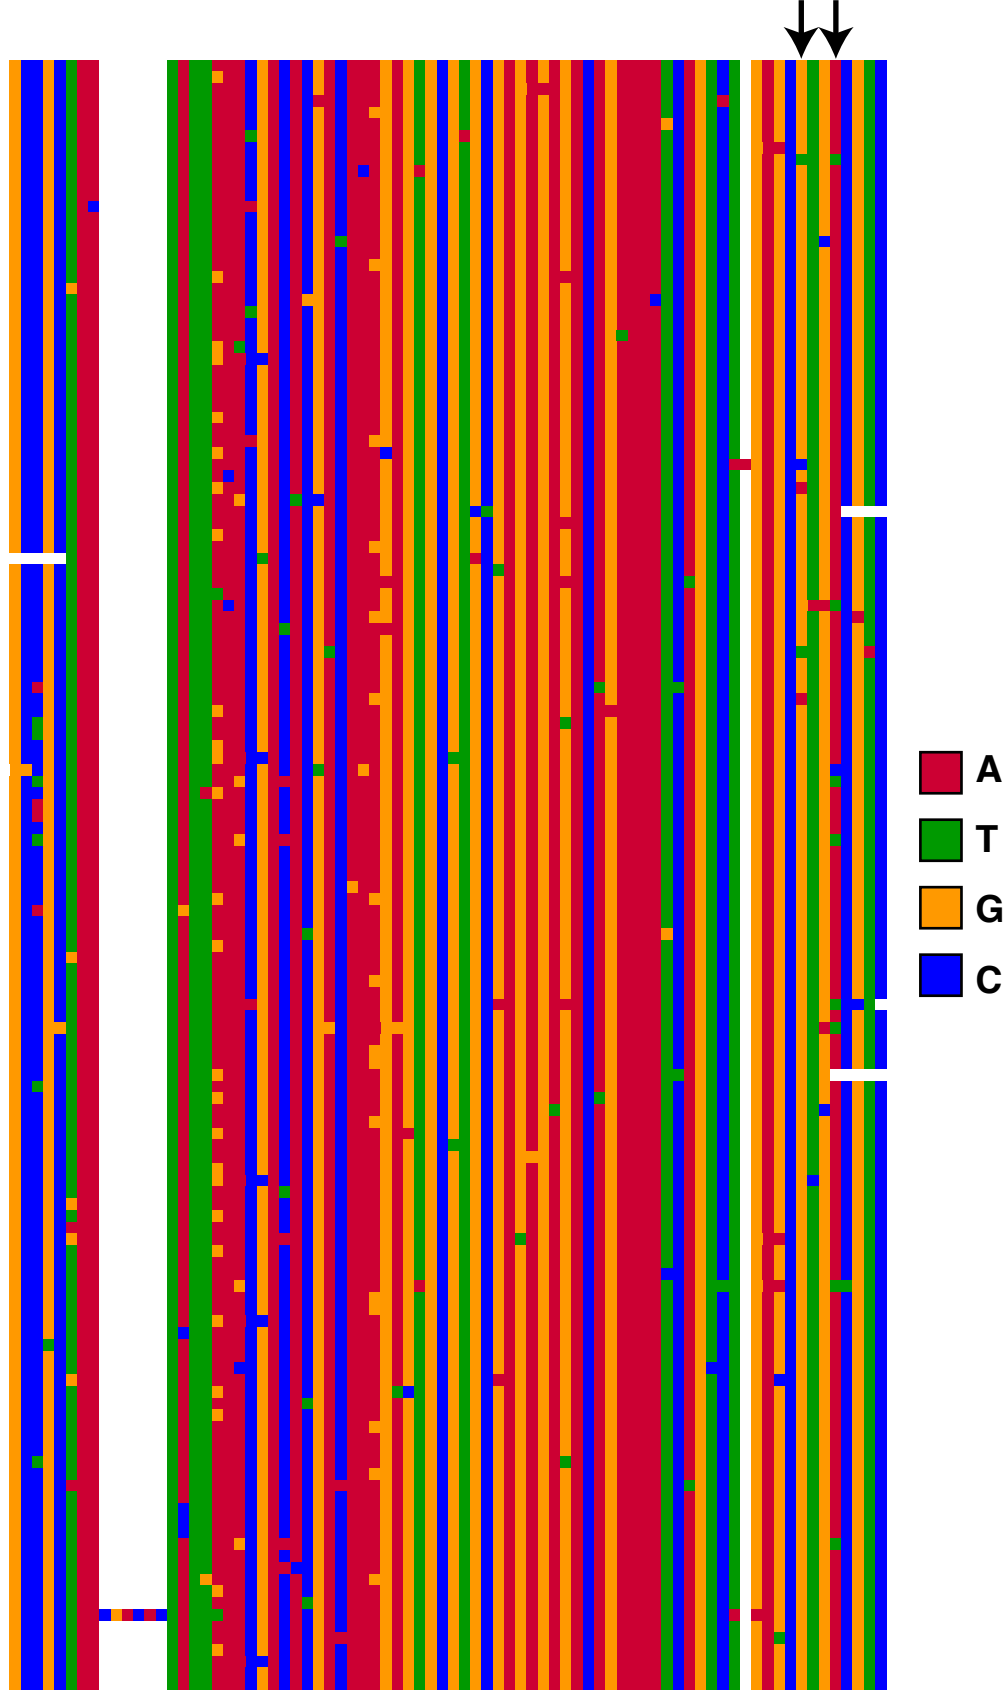

Supplement: supp [file elife_poa_e05899_Figure_1_figure_supplement_1.pdf › elife_poa_e05899_Figure_1_figure_supplement_1.pdf]

Insertion

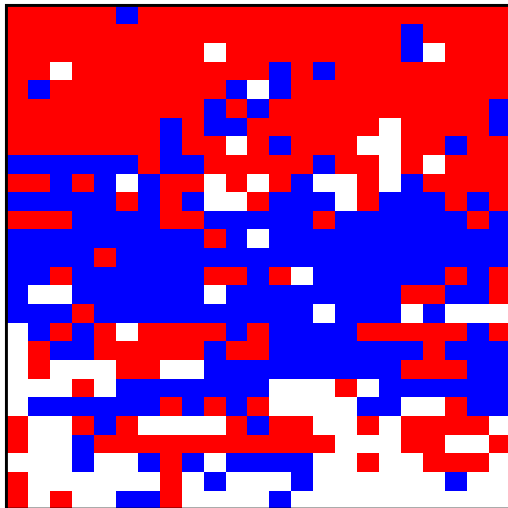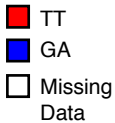

Individual

Supplement: supp [file elife_poa_e05899_Figure_4_figure_supplement_1.pdf › elife_poa_e05899_Figure_4_figure_supplement_1.pdf]
